# Supplementary material
Source: PubMed Central journal article supplement (PMC4128315)
Supplement: NIHMS604229-supplement-01.pdf [file NIHMS604229-supplement-01.pdf]

Supplemental Table 1. Task Development Stimuli Ratings

| Stimulus Class | "On a scale of 1 to 7, with 1 being the highest, ..." | Mean (SD)   | Minimum | Maximum | ICC Averages | ICC 95% C.I.   | Cronbach's alpha |
|----------------|-------------------------------------------------------|-------------|---------|---------|--------------|----------------|------------------|
| Foods          | how healthy is it?                                    | 3.65 (2.04) | 1.00    | 6.75    | 0.985        | (0.976, 0.992) | 0.985            |
|                | how yucky is it?                                      | 4.79 (1.15) | 2.60    | 6.30    | 0.917        | (0.868, 0.995) | 0.920            |
|                | how much do you want to eat it?                       | 4.25 (1.13) | 1.90    | 5.80    | 0.899        | (0.835, 0.946) | 0.901            |
|                | how fattening is it?                                  | 3.54 (2.11) | 1.05    | 6.50    | 0.991        | (0.985, 0.995) | 0.991            |
|                | how exciting is it?                                   | 3.77 (1.37) | 1.55    | 5.50    | 0.956        | (0.930, 0.976) | 0.959            |
|                | how pretty is it?                                     | 4.14 (1.38) | 1.30    | 6.40    | 0.914        | (0.914, 0.973) | 0.954            |
| Nonfoods       | how exciting is it?                                   | 3.70 (0.65) | 2.92    | 4.85    | 0.443        | (0.126, 0.723) | 0.574            |
|                | how familiar is it?                                   | 2.36 (0.74) | 1.38    | 3.85    | 0.642        | (0.362, 0.840) | 0.670            |
|                | how pretty is it?                                     | 3.77 (0.61) | 2.77    | 5.08    | 0.490        | (0.198, 0.746) | 0.650            |
|                | how strange is it?                                    | 5.14 (0.63) | 4.00    | 6.08    | 0.524        | (0.202, 0.776) | 0.601            |

ICC - intra-class correlation coefficients; C.I. - confidence intervals
